# Supplementary material for: A four-lncRNA signature for predicting prognosis of recurrence patients with gastric cancer
Source: publisher site journal article supplement (doi:10.1515/med-2021-0241), 2021-01-01
Supplement: Supplementary file 2 [file med-2021-0241_sm1.xlsx]

## Sheet: Sheet1
Table S1. The detailed clinical information of samples in TCGA datasets.
sampleID	RFS.time	RFS	age	gender	h_pylori_infection	neoplasm_histologic_grade	pathologic_M	pathologic_N	pathologic_T	pathologic_stage	radiation_therapy	targeted_molecular_therapy
TCGA-3M-AB46-01	1765	0	70	MALE	No	G2	MX	N0	T2b	Stage IB	YES	YES
TCGA-3M-AB47-01	395	1	51	MALE	No	G3	MX	N2	T3	Stage IIIB	YES	YES
TCGA-B7-A5TI-01	595	0	52	MALE	Yes	G3	M0	N3	T4	Stage IIIC	NO	YES
TCGA-B7-A5TJ-01	335	0	74	MALE	Yes	G1	M0	NX	T4a	Stage IIB	NO	NO
TCGA-B7-A5TK-01	288	0	51	MALE	Yes	G3	M0	[Discrepancy]	T4	Stage IIIA	NO	YES
TCGA-B7-A5TN-01	287	0	60	MALE	Yes	G2	M0	NX	T4a	Stage IIB	NO	YES
TCGA-BR-4187-01	141	0	56	MALE		G3	M0	NX	TX		NO	NO
TCGA-BR-4191-01	558	0	72	MALE		G2	M0	N1	TX		NO	YES
TCGA-BR-4201-01	940	0	66	FEMALE		G1	M0	NX	T2a		NO	YES
TCGA-BR-4253-01	124	0	80	FEMALE		G3	M0	N1	T3	Stage IIIA	NO	NO
TCGA-BR-4256-01	284	0	80	MALE		G2	M0	N1	TX		NO	NO
TCGA-BR-4257-01	294	0	79	FEMALE		G2	M0	NX	TX		NO	NO
TCGA-BR-4267-01	188	0	51	MALE		G2	M0	N0	T2a	Stage IB	NO	NO
TCGA-BR-4279-01	291	0	43	MALE		G3	M0	N1	T2a	Stage II	NO	YES
TCGA-BR-4280-01	201	0	78	FEMALE		G2	M0	N1	T2b	Stage III	NO	NO
TCGA-BR-6453-01	485	0	54	MALE		G3	M0	N1	T2	Stage IIA	NO	NO
TCGA-BR-6455-01	385	1	59	MALE		G3	M0	N1	T3	Stage IIB	NO	YES
TCGA-BR-6456-01	526	0	74	FEMALE		G2	M0	N1	T3	Stage IIB	NO	NO
TCGA-BR-6457-01	416	0	69	MALE		G3	M0	N0	T3	Stage IIA	NO	YES
TCGA-BR-6458-01	574	1	57	FEMALE		G3	M0	N1	T3	Stage IIB	NO	YES
TCGA-BR-6563-01	1190	0	60	MALE		G3	M0	N1	T3	Stage IIB	NO	NO
TCGA-BR-6564-01	794	0	46	FEMALE		G3	M0	N2	T3	Stage IIIA	NO	NO
TCGA-BR-6565-01	279	0	67	MALE		G2	M0	N0	T4a	Stage IIB	NO	NO
TCGA-BR-6566-01	997	0	64	FEMALE		G3	M0	N0	T3	Stage IIA	NO	NO
TCGA-BR-6707-01	426	1	75	MALE		G3	M0	N0	T3	Stage IIA	NO	NO
TCGA-BR-6709-01	370	0	57	FEMALE		G3	M0	N3a	T3	Stage IIIB	NO	YES
TCGA-BR-6801-01	1223	0	70	MALE		G2	M0	N0	T3	Stage IIA	NO	NO
TCGA-BR-6802-01	807	1	65	MALE		G3	M0	N2	T3	Stage IIIA	NO	NO
TCGA-BR-6803-01	949	0	54	FEMALE		G3	M0	N0	T3	Stage IIA	NO	NO
TCGA-BR-6852-01	1367	0	64	FEMALE		G3	M0	N0	T3	Stage IIA	NO	NO
TCGA-BR-7196-01	666	0	64	MALE		G3	M1	N3a	T3	Stage IV	NO	YES
TCGA-BR-7197-01	280	0	69	MALE		GX	M0	N0	T3	Stage II	NO	NO
TCGA-BR-7704-01	1072	0	69	FEMALE		G3	M0	N0	T3	Stage II	NO	NO
TCGA-BR-7707-01	1090	0	69	FEMALE		G3	M0	N0	T2	Stage IB	NO	NO
TCGA-BR-7715-01	1023	0	65	MALE		G2	M0	N0	T3	Stage IIA	NO	NO
TCGA-BR-7716-01	1210	0	62	FEMALE		G2	M0	N1	T3	Stage IIB	NO	NO
TCGA-BR-7717-01	552	0	63	MALE		G2	M0	N1	T4	Stage IV	NO	NO
TCGA-BR-7722-01	466	0	62	MALE		G3	M0	N1	T3	Stage IIB	NO	NO
TCGA-BR-7723-01	559	1	59	MALE		G3	M0	N3a	T3	Stage IIIB	NO	NO
TCGA-BR-7901-01	91	1	74	MALE		G2	M0	N1	T3	Stage IIB	NO	NO
TCGA-BR-7957-01	276	0	50	FEMALE		GX	M1	N3a	T3	Stage IV	NO	NO
TCGA-BR-7958-01	899	0	60	MALE		G3	M0	N0	T4b	Stage IIIB	NO	NO
TCGA-BR-7959-01	1010	0	59	MALE		G3	M0	N1	T4a	Stage IIIA	NO	YES
TCGA-BR-8058-01	1133	0	53	FEMALE		G3	M0	N2	T4a	Stage IIIB	NO	NO
TCGA-BR-8059-01	439	0	72	MALE		G3	M0	N1	T4	Stage III	NO	NO
TCGA-BR-8060-01	348	0	75	FEMALE		G3	M0	N2	T2	Stage IIB	NO	NO
TCGA-BR-8077-01	21	0	58	FEMALE		G2	M0	N1	T4b	Stage IIIB
TCGA-BR-8080-01	292	0	72	FEMALE		G3	M0	N3a	T4	Stage IIIC	NO	NO
TCGA-BR-8081-01	981	0	71	FEMALE		G2	M0	N0	T4a	Stage IIB	NO	NO
TCGA-BR-8284-01	245	0	72	FEMALE		G3	M0	N3a	T4a	Stage IIIC	NO	NO
TCGA-BR-8286-01	895	0	49	MALE		G3	M0	N0	T3	Stage II	NO	NO
TCGA-BR-8289-01	81	0	57	MALE		G3	M1	N3a	T4	Stage IV	NO	NO
TCGA-BR-8291-01	607	0	61	MALE		GX	M0	N1	T3	Stage IIB	NO	YES
TCGA-BR-8295-01	67	0	60	FEMALE		G3	M0	N0	T4a	Stage IIB	NO	NO
TCGA-BR-8296-01	390	1	58	FEMALE		G3	M0	N2	T4b	Stage IIIC	NO	YES
TCGA-BR-8297-01	225	0	58	MALE		GX	M0	N3a	T4b	Stage IIIC	NO	YES
TCGA-BR-8361-01	946	0	71	FEMALE		G3	M0	N2	T4b	Stage IIIC	NO	NO
TCGA-BR-8364-01	675	0	42	FEMALE		G3	M0	N2	T4b	Stage IIIC	NO	NO
TCGA-BR-8367-01	580	1	55	MALE		G3	M0	N3a	T3	Stage IIIB	NO	YES
TCGA-BR-8368-01	131	0	84	FEMALE		G3	M0	N0	T2	Stage IB	NO	NO
TCGA-BR-8369-01	419	1	76	FEMALE		G3	M0	N3a	T3	Stage IIIB	NO	NO
TCGA-BR-8371-01	357	1	62	MALE		G3	M0	N3a	T3	Stage IIIB	NO	YES
TCGA-BR-8372-01	951	0	63	MALE		G3	M0	N3a	T4b	Stage IIIC	NO	YES
TCGA-BR-8373-01	450	0	65	FEMALE		G2	M0	N1	T4a	Stage IIIA	NO	YES
TCGA-BR-8380-01	467	1	55	MALE		G3	M0	N3a	T4a	Stage IIIC	NO	YES
TCGA-BR-8381-01	224	0	51	MALE		G3	M0	N1	T3	Stage IIB	NO	YES
TCGA-BR-8382-01	762	0	67	FEMALE		G3	M0	N3a	T4b	Stage IIIC	NO	NO
TCGA-BR-8384-01	113	0	69	MALE		G3	M0	N2	T4b	Stage IIIC	NO	NO
TCGA-BR-8484-01	766	0	61	MALE		G2	M0	N1	T4a	Stage IIIA	NO	NO
TCGA-BR-8485-01	280	0	68	FEMALE		G3	M0	N3a	T4	Stage IIIC	NO	NO
TCGA-BR-8486-01	615	0	90	FEMALE		G2	M0	N0	T1b	Stage IA	NO	NO
TCGA-BR-8487-01	34	0	64	FEMALE		G3	M0	N0	T3	Stage IIA	NO	NO
TCGA-BR-8588-01	389	0	55	FEMALE		G3	M0	N0	T4a	Stage IIB	NO	NO
TCGA-BR-8589-01	825	0	56	MALE		G3	M0	N1	T4b	Stage IIIB	NO	NO
TCGA-BR-8590-01	223	1	62	MALE		G3	M0	N2	T4b	Stage IIIC	NO	YES
TCGA-BR-8591-01	856	0	79	MALE		G3	M0	N3a	T4a	Stage IIIC	NO	NO
TCGA-BR-8592-01	191	0	63	FEMALE		G3	M0	N1	T4b	Stage IIIB	NO	YES
TCGA-BR-8677-01	813	0	74	FEMALE		G3	M0	N3a	T3	Stage IIIB	NO	NO
TCGA-BR-8678-01	754	0	76	MALE		G2	M0	N0	T2	Stage IB	NO	NO
TCGA-BR-8680-01	972	0	45	MALE		G2	M1	N2	T4b	Stage IV	NO	YES
TCGA-BR-8682-01	991	0	52	MALE	No	G3	M0	N0	T4a	Stage IIB	NO	YES
TCGA-BR-8683-01	300	0	75	MALE		G3	M0	N2	T4a	Stage IIIB	NO
TCGA-BR-8686-01	635	0	69	MALE		G3	M0	N1	T4b	Stage IIIB	NO	NO
TCGA-BR-8687-01	250	0	67	FEMALE		G3	M0	N2	T4b	Stage IIIC	NO	NO
TCGA-BR-8690-01	325	0	54	FEMALE		G2	M0	N3a	T3	Stage IIIB	NO	YES
TCGA-BR-A44T-01	1038	0	53	FEMALE		G3	M0	N0	T3	Stage IIA	NO	YES
TCGA-BR-A44U-01	422	0	70	MALE		G3	M0	N3a	T3	Stage IIIB	NO	NO
TCGA-BR-A4CS-01	45	0	77	MALE		G3	M0	N3a	T4b	Stage IIIC	NO	NO
TCGA-BR-A4IV-01	737	1	47	MALE		G3	M0	N2	T4a	Stage IIIB	NO	YES
TCGA-BR-A4J5-01	862	0	56	MALE		G3	M0	N1	T4a	Stage IIIA	NO
TCGA-BR-A4J6-01	20	0	69	FEMALE		G2	M0	N0	T3	Stage IIA	NO	NO
TCGA-BR-A4J7-01	989	0	49	MALE		G3	M0	NX	T4a	Stage IIB	NO	NO
TCGA-BR-A4J9-01	14	0	55	MALE		G3	M0	N0	T3	Stage IIA	NO	NO
TCGA-BR-A4PF-01	35	0	72	MALE		G3	M0	N2	T4a	Stage IIIB	NO	NO
TCGA-BR-A4QL-01	491	0	75	FEMALE	No	G2	M0	N3a	T3	Stage IIIB	NO	YES
TCGA-CD-5798-01	408	0	82	MALE		G2	M0	N0	T3	Stage II	NO	YES
TCGA-CD-5799-01	396	0	45	MALE		G3	M0	N1	T2	Stage II	NO	YES
TCGA-CD-5800-01	400	0	51	FEMALE		G1	M0	N0	T3	Stage II	NO	NO
TCGA-CD-5801-01	401	0	69	MALE		G3	M0	N1	T3	Stage IIIA	NO	NO
TCGA-CD-5803-01	300	1	78	FEMALE		G3	M0	N0	T3	Stage II	NO	NO
TCGA-CD-5804-01	368	0	90	MALE	No	G2	M0	N1	T3	[Discrepancy]	NO	YES
TCGA-CD-5813-01	315	1	60	MALE		G3	M0	N0	T3	Stage II	NO	NO
TCGA-CD-8524-01	69	1	61	FEMALE		G3	M0	N0	T3	Stage II	NO	NO
TCGA-CD-8525-01	383	0	82	FEMALE		G3	M0	N1	T3	Stage IIIA	YES	YES
TCGA-CD-8526-01	381	0	73	FEMALE		G3	M0	N1	T3	Stage IIIA	NO	YES
TCGA-CD-8527-01	159	1	72	FEMALE		G2	M0	N1	T2	Stage II	NO	YES
TCGA-CD-8528-01	375	0	43	FEMALE		G3	M0	N0	T4	Stage IIIA	YES	YES
TCGA-CD-8529-01	374	0	65	MALE		G2	M1	N0	T4	Stage IV	YES	YES
TCGA-CD-8530-01	377	0	51	MALE		G3	M0	N0	T3	Stage II	YES	YES
TCGA-CD-8531-01	383	0	66	FEMALE		G3	M0	N1	T3	Stage IIIA	YES	YES
TCGA-CD-8532-01	282	1	52	MALE		G2	M0	N0	T3	Stage II	NO	NO
TCGA-CD-8533-01	226	1	48	MALE		G3	M0	N0	T3	Stage II	NO	NO
TCGA-CD-8534-01	201	1	41	MALE		G3	M0	N0	T3	Stage II	NO	NO
TCGA-CD-8535-01	390	0	59	MALE		G3	M0	N1	T3	Stage IIIA	NO	YES
TCGA-CD-A486-01	79	1	68	MALE		G2	M0	N0	T3	Stage IIA	NO	YES
TCGA-CD-A487-01	374	0	51	MALE		G3	M0	N1	T3	Stage IIB	NO	YES
TCGA-CD-A489-01	277	1	58	MALE		G3	M0	N0	T3	Stage IIA	NO	NO
TCGA-CD-A48A-01	378	0	57	MALE		G2	M0	N0	T3	Stage IIA	YES	YES
TCGA-CD-A48C-01	230	1	79	FEMALE		G3	M0	N1	T3	Stage IIB	NO	NO
TCGA-CD-A4MG-01	74	1	76	MALE		G3	M0	N0	T3	Stage IIA	NO	NO
TCGA-CD-A4MH-01	371	0	86	FEMALE		G2	M0	N0	T3	Stage IIA	YES	YES
TCGA-CG-4305-01	457	1	69	MALE		G3	M0	N1	T2a	Stage II	NO	YES
TCGA-CG-4436-01	243	0	57	MALE		G2	M0	N0	T2	Stage IB	NO	NO
TCGA-CG-4437-01	245	0	83	MALE		G2	M0	N1	T2	Stage II	NO	NO
TCGA-CG-4444-01	1431	0	76	MALE		G3	M0	N2	T2b	Stage IIIA	YES	YES
TCGA-CG-4460-01	487	1	66	FEMALE		G2	M1	N1	T4	Stage IV	NO	YES
TCGA-CG-4466-01	577	0	81	FEMALE		G2	M0	N0	T2a	Stage IB	NO	NO
TCGA-CG-4475-01	699	0	76	MALE		G3	M0	N1	T3	Stage IIB	NO	NO
TCGA-CG-4477-01	365	1	58	FEMALE		G3	M0	N0	T2a	Stage IB	YES	YES
TCGA-CG-5717-01	120	1	58	MALE	No	G3	M0	N1	T2b	Stage II	NO	YES
TCGA-CG-5721-01	183	0	58	MALE	Yes	G3	M0	N1	T4	Stage IV	NO	NO
TCGA-CG-5724-01	122	1	59	MALE		G3	M1	N3	T3	Stage IV	NO	YES
TCGA-CG-5725-01	153	1	72	MALE	No	G3	M0	N0	T2	Stage IB	NO	YES
TCGA-CG-5732-01	1949	1	66	MALE		G2	M0	N3	T2	Stage IV	NO	YES
TCGA-D7-5577-01	376	1	53	FEMALE	No	G2	M0	N3	T2	Stage IIIA	NO	YES
TCGA-D7-5578-01	385	0	80	MALE		G3	M0	N2	T3	Stage IIIA	NO	NO
TCGA-D7-6519-01	429	1	64	FEMALE	No	G3	M0	N1	T2	[Discrepancy]	YES	YES
TCGA-D7-6520-01	46	1	53	MALE		G3	M0	N2	T2b	Stage IIIA	NO	NO
TCGA-D7-6521-01	192	1	65	MALE		G3	M0	N2	T2b	[Discrepancy]	NO	YES
TCGA-D7-6522-01	566	0	58	MALE		G3	M0	N0	T2	Stage IB	NO	NO
TCGA-D7-6524-01	543	1	53	MALE		G3	M0	N1	T2	Stage II	NO	NO
TCGA-D7-6525-01	171	1	58	MALE		G3	M0	N2	T2	Stage IIIA	NO	YES
TCGA-D7-6526-01	523	0	67	FEMALE		G2	M0	N2	T3	Stage IIIA	NO	YES
TCGA-D7-6527-01	75	1	62	MALE		G2	M0	N1	T2	Stage II	YES	YES
TCGA-D7-6528-01	463	0	70	FEMALE		G2	M0	N0	T2	Stage IB	NO	NO
TCGA-D7-6815-01	486	0	70	FEMALE	No	G2	M0	N2	T2	Stage IIB	NO	NO
TCGA-D7-6818-01	247	1	53	MALE	No	G3	M0	N3	T2	Stage IIIA	YES	YES
TCGA-D7-6822-01	375	0	77	MALE	No	G2	M0	N0	T2	Stage IB	NO	NO
TCGA-D7-8570-01	752	0	44	MALE	No	G3	M0	N3a	T3	Stage IIIB	NO	YES
TCGA-D7-8572-01	511	0	57	MALE	No	G2	M0	N2	T2	Stage IIB	NO	NO
TCGA-D7-8573-01	593	0	57	MALE	No	G3	M0	N0	T3	Stage IIA	NO	NO
TCGA-D7-8574-01	523	0	72	MALE	No	G3	M0	N3a	T2	Stage IIIA	NO	NO
TCGA-D7-8575-01	427	1	75	MALE	No	G3	M0	N2	T3	Stage IIIA	NO	NO
TCGA-D7-8576-01	204	1	54	FEMALE	No	G3	M0	N3a	T3	Stage IIIB	NO	NO
TCGA-D7-8578-01	451	1	72	MALE	No	G2	M0	N0	T2	Stage IB	NO	NO
TCGA-D7-8579-01	636	0	66	FEMALE	No	G2	M0	N2	T2	Stage IIB	YES	YES
TCGA-D7-A4YU-01	500	0	73	MALE	No	G3	M0	N3a	T3	Stage IIIB	NO	NO
TCGA-D7-A4YX-01	1108	0	63	MALE	No	G3	M0	N1	T3	Stage IIB	NO	NO
TCGA-D7-A4Z0-01	449	0	60	FEMALE	No	G3	M0	N2	T2	Stage IIB	YES	YES
TCGA-D7-A6EV-01	342	0	71	FEMALE	No	G3	M0	N2	T2	Stage IIB	NO	NO
TCGA-D7-A6EX-01	86	0	72	FEMALE	No	G3	M0	N2	T3	Stage IIIA	NO	NO
TCGA-D7-A6EY-01	348	0	72	FEMALE	No	G3	M0	N3a	T3	Stage IIIB	NO	NO
TCGA-D7-A6EZ-01	618	0	66	MALE	No	G3	M0	N2	T3	Stage IIIA	NO	NO
TCGA-D7-A6F0-01	678	0	79	FEMALE	No	G3	M0	N0	T2	Stage IB	NO	NO
TCGA-D7-A6F2-01	476	0	62	MALE		G3	M0	N0	T2	Stage IB	NO	NO
TCGA-D7-A748-01	99	1	41	FEMALE		G3	M1	N3	T4a	Stage IV	YES	YES
TCGA-D7-A74A-01	607	0	61	FEMALE	No	G2	M0	N2	T3	Stage IIIA	NO	NO
TCGA-F1-6874-01	440	0	79	MALE	No	G3	M0	N0	T2	Stage IB	NO	NO
TCGA-F1-6875-01	2197	0	79	MALE		G2	M0	N0	T2	Stage IA	NO	NO
TCGA-F1-A448-01	647	0	70	MALE	No	G3	M0	N3b	T3	Stage IIIB	YES	YES
TCGA-F1-A72C-01	343	1	68	MALE	No	G2	M0	N0	T3	Stage IIA	NO	YES
TCGA-FP-7735-01	106	0	77	MALE		G2	MX	N0	T2	Stage IB	NO	NO
TCGA-FP-7829-01	594	0	69	MALE		G2	M0	N1	T3	Stage IIB	YES	YES
TCGA-FP-7916-01	428	0	77	MALE		G3	MX	N3a	T4a	Stage IIIC	NO	NO
TCGA-FP-7998-01	678	0	77	MALE		G3	MX	N3a	T4a	Stage IIIC	NO	YES
TCGA-FP-8099-01	519	0	79	MALE		G2	MX	N0	T3	Stage IIA	NO	NO
TCGA-FP-8209-01	1676	1	49	MALE		G3	M0	N0	T2a	Stage IB	YES	YES
TCGA-FP-8210-01	153	0	48	MALE		G3	M0	N1	T3	Stage IIIA	YES	YES
TCGA-FP-8211-01	413	0	62	MALE		G2	MX	N1	T3	Stage IIB	YES	YES
TCGA-FP-8631-01	17	0	68	MALE		G2	MX	N2	T3	Stage IIIA
TCGA-FP-A4BF-01	159	1	68	MALE		G3	M0	N2	T3	Stage IIIA	NO	NO
TCGA-FP-A8CX-01	7	0	60	MALE	No	G3	MX	N3a	T4b	Stage IIIC
TCGA-FP-A9TM-01	189	0	77	MALE	No	G2	M0	N1	T1b	[Discrepancy]	YES	YES
TCGA-HF-7132-01	2351	0		MALE		G2	M0	N1	T2b	Stage II	YES	YES
TCGA-HF-7133-01	1918	0		FEMALE	No	G2	M0	N3	T2b	Stage IV	YES	YES
TCGA-HF-7134-01	1588	0		MALE	No	G2	M0	N0	T1	Stage IA	NO	NO
TCGA-HF-A5NB-01	928	0	75	FEMALE	No	G3	M0	N3a	T4a	Stage IIIC	YES	YES
TCGA-HJ-7597-01	795	1	71	FEMALE	No	G3	MX	N0	T2b	Stage IB	NO	NO
TCGA-HU-8238-01	46	0	56	MALE		G2	M0	N2	T3	[Discrepancy]	NO	YES
TCGA-HU-8244-01	742	0	77	FEMALE	No	G1	M0	N0	T1a	Stage IA	NO	NO
TCGA-HU-8249-01	881	0	76	MALE	No	G2	M0	N2	T3	Stage IIIA	NO	YES
TCGA-HU-8602-01	679	0	58	FEMALE	No	G3	M0	N0	T4a	Stage IIB	NO	YES
TCGA-HU-8604-01	694	0	82	FEMALE	No	G2	M0	N0	T3	Stage IIA	NO	YES
TCGA-HU-8608-01	641	0	70	MALE	No	G3	M0	N2	T4a	Stage IIIB	YES	YES
TCGA-HU-8610-01	23	0	75	MALE	No	G2	M0	N0	T1b	Stage IA	NO	NO
TCGA-HU-A4G2-01	739	0	45	MALE	Yes	G3	M0	N1	T3	Stage IIB	NO	YES
TCGA-HU-A4G3-01	170	0	54	MALE	No	G2	M0	N2	T2	Stage IIB	NO	YES
TCGA-HU-A4G8-01	544	0	71	FEMALE	No	G3	M0	N1	T3	Stage IIB	NO	YES
TCGA-HU-A4G9-01	736	0	67	FEMALE	No	G2	M0	N0	T1a	Stage IA	NO	NO
TCGA-HU-A4GC-01	99	0	74	MALE	No	G3	M0	N2	T4a	Stage IIIB	NO	NO
TCGA-HU-A4GF-01	785	0	69	MALE		G2	M0	N0	T3	Stage IIA	NO	NO
TCGA-HU-A4GH-01	358	0	75	MALE	No	G2	M0	N0	T1b	Stage IA	NO	NO
TCGA-HU-A4GJ-01	547	1	60	FEMALE	No	G3	M0	N3a	T4	Stage IIIC	NO	YES
TCGA-HU-A4GP-01	273	0	62	FEMALE		G2	M0	N1	T2	Stage IIA	NO	YES
TCGA-HU-A4GQ-01	3	0	71	MALE		G2	M0	N2	T4b	Stage IIIC	NO	NO
TCGA-HU-A4GT-01	198	0	71	FEMALE		G3	M0	N0	T3	Stage IIA	NO	YES
TCGA-HU-A4GU-01	200	0	73	MALE	No	G3	M0	N1	T3	Stage IIB	NO	NO
TCGA-HU-A4GX-01	616	0	70	FEMALE	No	G3	M0	N2	T4b	Stage IIIC	NO	YES
TCGA-HU-A4GY-01	8	0	76	FEMALE		G3	M0	N1	T4	Stage IIIA	NO	NO
TCGA-HU-A4H0-01	64	0	72	MALE	No	G3	M0	N3b	T4a	Stage IIIC	NO	NO
TCGA-HU-A4H2-01	394	0	58	FEMALE	No	G2	M0	N3b	T3	Stage IIIB	NO	NO
TCGA-HU-A4H3-01	466	1	56	FEMALE	No	G3	M0	N3b	T4a	Stage IIIC	[Discrepancy]	YES
TCGA-HU-A4H4-01	725	0	53	FEMALE	No	G3	M0	N2	T2	Stage IIB	NO	YES
TCGA-HU-A4H5-01	724	0	71	MALE	No	GX	M0	N0	T2	Stage IB	NO	YES
TCGA-HU-A4H6-01	476	0	72	FEMALE	No	G2	M0	N2	T3	Stage IIIA	NO	YES
TCGA-HU-A4H8-01	354	1	77	MALE	No	G2	M0	N1	T1b	Stage IB	NO	YES
TCGA-HU-A4HB-01	390	1	68	MALE	No	G3	M0	N2	T2	Stage IIB	NO	YES
TCGA-HU-A4HD-01	1016	0	73	MALE	No	G2	M0	N2	T3	Stage IIIA	NO	[Discrepancy]
TCGA-IN-7806-01	1106	0	50	MALE	No	G3	M0	N1	T3	Stage IIB	NO	YES
TCGA-IN-8462-01	270	1	80	MALE	No	G2	M0	N1	T2	Stage IIB	NO	NO
TCGA-IN-8663-01	103	0	68	MALE		G3	M0	N2	T2	Stage IIB	NO	NO
TCGA-IN-A6RI-01	559	0	45	MALE		G2	M0	N0	T1b	Stage I	NO	NO
TCGA-IN-A6RJ-01	379	0	64	MALE	No	G3	M0	N0	T1b	Stage IA	NO	NO
TCGA-IN-A6RL-01	307	1	84	MALE		G2	M0	N1	T2	Stage IIIA	NO	NO
TCGA-IN-A6RN-01	594	0	72	FEMALE		G2	M0	N2	T1b	Stage IIA	NO	NO
TCGA-IN-A6RO-01	154	1	70	MALE		G2	M0	N0	T1b	Stage IA	YES	YES
TCGA-IN-A6RR-01	205	0	84	MALE		G3	M0	N1	T3	Stage IIIA	NO	YES
TCGA-IN-A6RS-01	383	0	76	MALE		G2	M0	N0	T1b	Stage IA	NO	NO
TCGA-IN-A7NR-01	198	0	64	FEMALE		G3	M1	N3	T3	Stage IV	NO	YES
TCGA-IN-A7NT-01	323	0	73	FEMALE		G3	M0	N1	T3	Stage IIB	NO	YES
TCGA-IN-A7NU-01	337	1	69	MALE		G3	M0	N3	T3	Stage IIIB	NO	YES
TCGA-IN-AB1V-01	479	0	63	MALE		G2	M0	N0	T1b	Stage IA	NO	NO
TCGA-IN-AB1X-01	411	0	78	FEMALE		G3	M0	N0	T3	Stage IIA	NO	YES
TCGA-KB-A6F7-01	1935	0	54	FEMALE		G3	M0	N1	T1	Stage IB	YES	YES
TCGA-MX-A5UG-01	113	0	78	MALE	Yes	G3	M0	N1	T3	Stage IIIA	NO	NO
TCGA-MX-A5UJ-01	600	0	86	FEMALE	No	G3	M0	N2	T3	Stage IIIA	NO	NO
TCGA-MX-A663-01	218	1	66	MALE	No	G3	M0	N0	T3	Stage IIA	NO	NO
TCGA-MX-A666-01	427	0	61	MALE	No	G2	MX	NX	T2	Stage IIA	NO	YES
TCGA-R5-A7O7-01	1389	0	51	MALE	No	G2	M1	N1	T3	Stage IV	NO	NO
TCGA-R5-A7ZF-01	259	0	65	FEMALE	No	G2	M1	N1	T4a	Stage IV	NO	NO
TCGA-R5-A7ZI-01	2267	0	44	FEMALE	No	G3	M1	N1	T4	Stage IV	NO	NO
TCGA-R5-A7ZR-01	185	0	70	FEMALE	No	G2	M0	NX	T3	Stage III	NO	NO
TCGA-RD-A7BW-01	156	0	68	FEMALE	No	G3	M0	N0	T2	Stage IB	YES	YES
TCGA-RD-A7C1-01	438	1	82	MALE	No	G3	M0	N0	T2	Stage IB	NO	NO
TCGA-RD-A8MV-01	3720	0	56	MALE	Yes	G3	M0	N2	T3	Stage IIIB	YES	YES
TCGA-RD-A8MW-01	98	1	72	MALE	Yes	G3	M0	N2	T3	Stage IIIB	YES	YES
TCGA-RD-A8N0-01	1236	0	53	FEMALE	Yes	G3	M0	N2	T3	Stage IIIB	YES	YES
TCGA-RD-A8N1-01	3519	0	70	MALE	Yes	G3	M0	N2	T3	Stage IIIB	YES	YES
TCGA-RD-A8N2-01	3540	0	59	FEMALE	Yes	G3	M0	N0	T2	Stage IB	NO	NO
TCGA-RD-A8N4-01	2171	0	58	FEMALE	No	G3	M0	N1	T3	Stage IIIA	YES	YES
TCGA-RD-A8N5-01	1747	0	78	MALE	Yes	G2	M0	N1	T3	Stage IIIA	YES	YES
TCGA-RD-A8N9-01	1083	0	63	FEMALE	No	G3	M0	N1	T2	Stage II	YES	YES
TCGA-SW-A7EA-01	579	0	61	FEMALE	No	GX	M0	N0	T2	Stage IB	NO	NO
TCGA-SW-A7EB-01	176	0	45	MALE		G2	M0	N2	T3	Stage IIIA	NO	YES
TCGA-VQ-A8DT-01	1376	1	43	MALE	No	G3	M0	N3a	T3	Stage IIIB	YES	YES
TCGA-VQ-A8DZ-01	396	0	70	MALE	No	G3	M1	N3	T4	Stage IV	NO	YES
TCGA-VQ-A8E2-01	1319	0	57	MALE	No	G2	M0	N2	T3	Stage IIIB	YES	YES
TCGA-VQ-A8P2-01	1160	0	68	MALE	No	G2	M0	N1	T4a	Stage IIIA	YES	YES
TCGA-VQ-A8P3-01	1132	0	72	MALE	No	G2	M0	N1	T4	Stage IIIA	YES	YES
TCGA-VQ-A8P5-01	235	0	67	MALE	No	G3	M0	N0	T3	Stage IIA	YES	YES
TCGA-VQ-A8P8-01	942	0	72	FEMALE	No	G2	M0	N0	T4a	Stage IIB	NO	NO
TCGA-VQ-A8PB-01	1043	0	65	FEMALE	No	G2	M0	N0	T3	Stage II	YES	YES
TCGA-VQ-A8PE-01	675	0	78	MALE	No	G3	M0	N3a	T3	Stage IIIB	NO	NO
TCGA-VQ-A8PF-01	76	0	76	MALE	No	G3	M0	N3b	T3	Stage IIIB	NO	NO
TCGA-VQ-A8PJ-01	82	0	53	MALE	No	GX	M1	N2	T4	Stage IV	NO	NO
TCGA-VQ-A8PM-01	57	0	56	MALE	No	G3	M0	N3	T4	Stage IV	NO	NO
TCGA-VQ-A8PU-01	832	0	72	FEMALE	No	G3	M0	N1	T4a	Stage IIIA	YES	YES
TCGA-VQ-A8PX-01	1964	0	51	MALE	No	G2	M0	N0	T1	Stage IA	NO	NO
TCGA-VQ-A91E-01	664	0	67	FEMALE	No	G3	M0	N0	T4b	Stage IIIB	YES	YES
TCGA-VQ-A91K-01	1862	0	69	MALE	No	G2	M0	N1	T3	Stage IIIA	YES	YES
TCGA-VQ-A91S-01	1000	0	63	MALE	Yes	GX	M0	N1	T4b	Stage IIIB	YES	YES
TCGA-VQ-A91V-01	1184	1	58	MALE	No	G2	M0	N2	T3	Stage IIIA	YES	YES
TCGA-VQ-A91X-01	289	0	74	MALE	No	G3	M0	N2	T3	Stage IIIB	NO	NO
TCGA-VQ-A923-01	61	0	90	MALE	No	G3	M0	N1	T3	Stage IIIA	NO	NO
TCGA-VQ-A925-01	138	0	66	MALE	No	G2	M0	N2	T3	Stage IIIA	NO	NO
TCGA-VQ-A927-01	200	0	81	MALE	No	G1	M0	N3	T3	Stage IIIB	NO	NO
TCGA-VQ-A92D-01	2032	0	67	MALE	No	G2	M0	N0	T2b	Stage IB	NO	NO
TCGA-VQ-A94P-01	81	0	57	MALE	No	GX	MX	NX	T4	[Discrepancy]	NO	NO
TCGA-VQ-A94U-01	819	0	70	MALE	No	G3	M0	N0	T4a	Stage IIB	YES	YES
TCGA-VQ-AA68-01	1328	0	52	FEMALE	No	G2	M0	N3	T4a	Stage IIIC	YES	YES
TCGA-VQ-AA69-01	864	0	35	MALE	No	G2	M0	N2	T3	Stage IIIA	YES	YES
TCGA-VQ-AA6A-01	1184	0	56	MALE	No	G2	M0	N3a	T4	Stage IIIC	YES	YES
TCGA-VQ-AA6D-01	521	0	52	FEMALE	Yes	G2	M0	N1	T4a	Stage IIIA	YES	YES
TCGA-VQ-AA6F-01	1646	0	57	MALE	No	G2	M0	N1	T3	Stage IIB	YES	YES
TCGA-VQ-AA6J-01	838	0	75	MALE	No	G3	M0	N2	T4a	Stage IIIB	NO	NO
TCGA-ZA-A8F6-01	525	0	71	MALE	No	G2	MX	N0	T2	Stage IB	NO	NO
TCGA-ZQ-A9CR-01	24	0	79	FEMALE	No	G3	MX	N3	T4a	Stage IIIC	NO	NO
