# Supplementary material for: A four-lncRNA signature for predicting prognosis of recurrence patients with gastric cancer
Source: publisher site journal article supplement (doi:10.1515/med-2021-0241), 2021-01-01
Supplement: Supplementary file 3 [file med-2021-0241_sm2.xlsx]

## Sheet: Sheet1
Table S2. The detailed clinical information of samples in GSE26253.
GSM644950 1	FFPE material 5370941012_H.AVG_Signal	FFPE Gastric Adenocarcinoma	1B	43.9	0
GSM644949 1	FFPE material 5370941012_G.AVG_Signal	FFPE Gastric Adenocarcinoma	4	8.5	1
GSM644948 1	FFPE material 5370941012_F.AVG_Signal	FFPE Gastric Adenocarcinoma	1B	54.4	0
GSM644947 1	FFPE material 5370941012_E.AVG_Signal	FFPE Gastric Adenocarcinoma	1B	50	0
GSM644946 1	FFPE material 5370941012_D.AVG_Signal	FFPE Gastric Adenocarcinoma	2	49.9	1
GSM644945 1	FFPE material 5370941012_B.AVG_Signal	FFPE Gastric Adenocarcinoma	2	5.3	1
GSM644944 1	FFPE material 5370941011_F.AVG_Signal	FFPE Gastric Adenocarcinoma	2	63	0
GSM644943 1	FFPE material 5370941011_E.AVG_Signal	FFPE Gastric Adenocarcinoma	3A	21.6	1
GSM644942 1	FFPE material 5370941011_D.AVG_Signal	FFPE Gastric Adenocarcinoma	2	44.1	1
GSM644941 1	FFPE material 5370941011_C.AVG_Signal	FFPE Gastric Adenocarcinoma	1B	61.1	0
GSM644940 1	FFPE material 5370941011_B.AVG_Signal	FFPE Gastric Adenocarcinoma	3A	60	0
GSM644939 1	FFPE material 5370941011_A.AVG_Signal	FFPE Gastric Adenocarcinoma	2	31.3	1
GSM644938 1	FFPE material 5370908048_G.AVG_Signal	FFPE Gastric Adenocarcinoma	1B	61.6	0
GSM644937 1	FFPE material 5370908048_F.AVG_Signal	FFPE Gastric Adenocarcinoma	4	17.9	1
GSM644936 1	FFPE material 5370908048_E.AVG_Signal	FFPE Gastric Adenocarcinoma	2	35.9	0
GSM644935 1	FFPE material 5370908048_D.AVG_Signal	FFPE Gastric Adenocarcinoma	4	17.7	1
GSM644934 1	FFPE material 5370908048_C.AVG_Signal	FFPE Gastric Adenocarcinoma	1B	74.2	0
GSM644933 1	FFPE material 5370908048_B.AVG_Signal	FFPE Gastric Adenocarcinoma	2	74.3	0
GSM644932 1	FFPE material 5370908048_A.AVG_Signal	FFPE Gastric Adenocarcinoma	1B	73.9	0
GSM644931 1	FFPE material 5370908044_H.AVG_Signal	FFPE Gastric Adenocarcinoma	1B	30.2	1
GSM644930 1	FFPE material 5370908044_G.AVG_Signal	FFPE Gastric Adenocarcinoma	2	77.1	0
GSM644929 1	FFPE material 5370908044_F.AVG_Signal	FFPE Gastric Adenocarcinoma	4	14.4	1
GSM644928 1	FFPE material 5370908044_E.AVG_Signal	FFPE Gastric Adenocarcinoma	3B	18.6	1
GSM644927 1	FFPE material 5370908044_D.AVG_Signal	FFPE Gastric Adenocarcinoma	2	79.8	0
GSM644926 1	FFPE material 5370908044_C.AVG_Signal	FFPE Gastric Adenocarcinoma	2	82.4	0
GSM644925 1	FFPE material 5370908044_B.AVG_Signal	FFPE Gastric Adenocarcinoma	2	24.9	1
GSM644924 1	FFPE material 5370908044_A.AVG_Signal	FFPE Gastric Adenocarcinoma	1B	84.5	0
GSM644923 1	FFPE material 5370908043_H.AVG_Signal	FFPE Gastric Adenocarcinoma	1B	85.6	0
GSM644922 1	FFPE material 5370908043_G.AVG_Signal	FFPE Gastric Adenocarcinoma	4	62.1	0
GSM644921 1	FFPE material 5370908043_F.AVG_Signal	FFPE Gastric Adenocarcinoma	3A	6.8	1
GSM644920 1	FFPE material 5370908043_E.AVG_Signal	FFPE Gastric Adenocarcinoma	2	55.8	0
GSM644919 1	FFPE material 5370908043_D.AVG_Signal	FFPE Gastric Adenocarcinoma	3A	12.7	1
GSM644918 1	FFPE material 5370908043_C.AVG_Signal	FFPE Gastric Adenocarcinoma	3A	17.5	1
GSM644917 1	FFPE material 5370908043_B.AVG_Signal	FFPE Gastric Adenocarcinoma	2	87.8	0
GSM644916 1	FFPE material 5370908043_A.AVG_Signal	FFPE Gastric Adenocarcinoma	2	83.5	0
GSM644915 1	FFPE material 5370908034_H.AVG_Signal	FFPE Gastric Adenocarcinoma	4	82.4	0
GSM644914 1	FFPE material 5370908034_G.AVG_Signal	FFPE Gastric Adenocarcinoma	3A	74.9	0
GSM644913 1	FFPE material 5370908034_F.AVG_Signal	FFPE Gastric Adenocarcinoma	2	85.1	0
GSM644912 1	FFPE material 5370908034_E.AVG_Signal	FFPE Gastric Adenocarcinoma	2	91.1	0
GSM644911 1	FFPE material 5370908034_D.AVG_Signal	FFPE Gastric Adenocarcinoma	3A	41.3	1
GSM644910 1	FFPE material 5370908034_C.AVG_Signal	FFPE Gastric Adenocarcinoma	2	5.5	1
GSM644909 1	FFPE material 5370908034_B.AVG_Signal	FFPE Gastric Adenocarcinoma	2	6.6	1
GSM644908 1	FFPE material 5370908034_A.AVG_Signal	FFPE Gastric Adenocarcinoma	3A	70.6	1
GSM644907 1	FFPE material 5370908015_H.AVG_Signal	FFPE Gastric Adenocarcinoma	2	47.9	1
GSM644906 1	FFPE material 5370908015_G.AVG_Signal	FFPE Gastric Adenocarcinoma	2	63.5	1
GSM644905 1	FFPE material 5370908015_F.AVG_Signal	FFPE Gastric Adenocarcinoma	2	28.6	1
GSM644904 1	FFPE material 5370908015_E.AVG_Signal	FFPE Gastric Adenocarcinoma	4	16.3	1
GSM644903 1	FFPE material 5370908015_D.AVG_Signal	FFPE Gastric Adenocarcinoma	2	103.1	0
GSM644902 1	FFPE material 5370908015_C.AVG_Signal	FFPE Gastric Adenocarcinoma	4	55.2	0
GSM644901 1	FFPE material 5370908015_B.AVG_Signal	FFPE Gastric Adenocarcinoma	1B	6.4	1
GSM644900 1	FFPE material 5370908015_A.AVG_Signal	FFPE Gastric Adenocarcinoma	4	27.4	1
GSM644899 1	FFPE material 5368120020_H.AVG_Signal	FFPE Gastric Adenocarcinoma	4	13.1	1
GSM644898 1	FFPE material 5368120020_E.AVG_Signal	FFPE Gastric Adenocarcinoma	2	33.6	0
GSM644897 1	FFPE material 5368120020_D.AVG_Signal	FFPE Gastric Adenocarcinoma	4	51.8	0
GSM644896 1	FFPE material 5368120020_C.AVG_Signal	FFPE Gastric Adenocarcinoma	4	4.2	1
GSM644895 1	FFPE material 5368120020_B.AVG_Signal	FFPE Gastric Adenocarcinoma	3A	116	1
GSM644894 1	FFPE material 5368120020_A.AVG_Signal	FFPE Gastric Adenocarcinoma	3A	101.1	0
GSM644893 1	FFPE material 5368120017_H.AVG_Signal	FFPE Gastric Adenocarcinoma	3B	121.8	0
GSM644892 1	FFPE material 5368120017_G.AVG_Signal	FFPE Gastric Adenocarcinoma	2	114.8	0
GSM644891 1	FFPE material 5368120017_F.AVG_Signal	FFPE Gastric Adenocarcinoma	2	87.1	1
GSM644890 1	FFPE material 5368120017_E.AVG_Signal	FFPE Gastric Adenocarcinoma	3A	17.7	1
GSM644889 1	FFPE material 5368120017_C.AVG_Signal	FFPE Gastric Adenocarcinoma	4	4.8	1
GSM644888 1	FFPE material 5368120017_B.AVG_Signal	FFPE Gastric Adenocarcinoma	4	6.3	1
GSM644887 1	FFPE material 5368120017_A.AVG_Signal	FFPE Gastric Adenocarcinoma	3A	30.4	1
GSM644886 1	FFPE material 5368120016_H.AVG_Signal	FFPE Gastric Adenocarcinoma	1B	95.8	0
GSM644885 1	FFPE material 5368120016_G.AVG_Signal	FFPE Gastric Adenocarcinoma	3A	25.2	1
GSM644884 1	FFPE material 5368120016_F.AVG_Signal	FFPE Gastric Adenocarcinoma	1B	119.1	0
GSM644883 1	FFPE material 5368120016_D.AVG_Signal	FFPE Gastric Adenocarcinoma	3A	43.1	1
GSM644882 1	FFPE material 5368120016_C.AVG_Signal	FFPE Gastric Adenocarcinoma	3A	7.8	1
GSM644881 1	FFPE material 5368120016_B.AVG_Signal	FFPE Gastric Adenocarcinoma	1B	143.8	0
GSM644880 1	FFPE material 5368120016_A.AVG_Signal	FFPE Gastric Adenocarcinoma	2	15.8	1
GSM644879 1	FFPE material 5368120008_H.AVG_Signal	FFPE Gastric Adenocarcinoma	2	19.4	0
GSM644878 1	FFPE material 5368120008_G.AVG_Signal	FFPE Gastric Adenocarcinoma	4	25.9	1
GSM644877 1	FFPE material 5368120008_F.AVG_Signal	FFPE Gastric Adenocarcinoma	2	93.7	0
GSM644876 1	FFPE material 5368120008_E.AVG_Signal	FFPE Gastric Adenocarcinoma	1B	73.7	0
GSM644875 1	FFPE material 5368120008_D.AVG_Signal	FFPE Gastric Adenocarcinoma	3A	154.5	0
GSM644874 1	FFPE material 5368120008_C.AVG_Signal	FFPE Gastric Adenocarcinoma	3B	23.3	1
GSM644873 1	FFPE material 5368120039_F.AVG_Signal	FFPE Gastric Adenocarcinoma	1B	39.7	0
GSM644872 1	FFPE material 5368120039_E.AVG_Signal	FFPE Gastric Adenocarcinoma	1B	49.9	0
GSM644871 1	FFPE material 5368120039_D.AVG_Signal	FFPE Gastric Adenocarcinoma	2	51.3	0
GSM644870 1	FFPE material 5368120039_C.AVG_Signal	FFPE Gastric Adenocarcinoma	2	11.1	0
GSM644869 1	FFPE material 5368120039_B.AVG_Signal	FFPE Gastric Adenocarcinoma	2	39.2	0
GSM644868 1	FFPE material 5368120039_A.AVG_Signal	FFPE Gastric Adenocarcinoma	2	12	1
GSM644867 1	FFPE material 5368120037_H.AVG_Signal	FFPE Gastric Adenocarcinoma	1B	61.1	0
GSM644866 1	FFPE material 5368120037_G.AVG_Signal	FFPE Gastric Adenocarcinoma	2	10.7	1
GSM644865 1	FFPE material 5368120037_F.AVG_Signal	FFPE Gastric Adenocarcinoma	3A	63	0
GSM644864 1	FFPE material 5368120037_E.AVG_Signal	FFPE Gastric Adenocarcinoma	2	59.8	0
GSM644863 1	FFPE material 5368120037_D.AVG_Signal	FFPE Gastric Adenocarcinoma	1B	61.1	0
GSM644862 1	FFPE material 5368120037_C.AVG_Signal	FFPE Gastric Adenocarcinoma	2	61.5	0
GSM644861 1	FFPE material 5368120037_A.AVG_Signal	FFPE Gastric Adenocarcinoma	4	67.5	1
GSM644860 1	FFPE material 5083984021_H.AVG_Signal	FFPE Gastric Adenocarcinoma	1B	69.5	0
GSM644859 1	FFPE material 5083984021_F.AVG_Signal	FFPE Gastric Adenocarcinoma	3A	61.9	0
GSM644858 1	FFPE material 5083984021_C.AVG_Signal	FFPE Gastric Adenocarcinoma	4	25.1	1
GSM644857 1	FFPE material 5083984021_B.AVG_Signal	FFPE Gastric Adenocarcinoma	3A	9.9	1
GSM644856 1	FFPE material 5083984019_H.AVG_Signal	FFPE Gastric Adenocarcinoma	1B	67.5	0
GSM644855 1	FFPE material 5083984019_G.AVG_Signal	FFPE Gastric Adenocarcinoma	4	60.8	0
GSM644854 1	FFPE material 5083984019_E.AVG_Signal	FFPE Gastric Adenocarcinoma	2	23	1
GSM644853 1	FFPE material 5083984019_D.AVG_Signal	FFPE Gastric Adenocarcinoma	2	79.5	0
GSM644852 1	FFPE material 5083984019_C.AVG_Signal	FFPE Gastric Adenocarcinoma	2	36	0
GSM644851 1	FFPE material 5083984019_B.AVG_Signal	FFPE Gastric Adenocarcinoma	3A	18	1
GSM644850 1	FFPE material 5083984008_H.AVG_Signal	FFPE Gastric Adenocarcinoma	2	82.8	0
GSM644849 1	FFPE material 5083984008_G.AVG_Signal	FFPE Gastric Adenocarcinoma	2	29.5	1
GSM644848 1	FFPE material 5083984008_F.AVG_Signal	FFPE Gastric Adenocarcinoma	1B	67.8	0
GSM644847 1	FFPE material 5083984008_E.AVG_Signal	FFPE Gastric Adenocarcinoma	2	9.1	0
GSM644846 1	FFPE material 5083984008_C.AVG_Signal	FFPE Gastric Adenocarcinoma	2	57.6	1
GSM644845 1	FFPE material 5083984008_B.AVG_Signal	FFPE Gastric Adenocarcinoma	3A	87.9	0
GSM644844 1	FFPE material 5083888030_H.AVG_Signal	FFPE Gastric Adenocarcinoma	2	19.1	1
GSM644843 1	FFPE material 5083888030_G.AVG_Signal	FFPE Gastric Adenocarcinoma	3A	85.4	0
GSM644842 1	FFPE material 5083888030_F.AVG_Signal	FFPE Gastric Adenocarcinoma	2	85.4	0
GSM644841 1	FFPE material 5083888030_E.AVG_Signal	FFPE Gastric Adenocarcinoma	2	88.9	0
GSM644840 1	FFPE material 5083888030_D.AVG_Signal	FFPE Gastric Adenocarcinoma	3A	28.2	0
GSM644839 1	FFPE material 5083888030_C.AVG_Signal	FFPE Gastric Adenocarcinoma	2	82.3	0
GSM644838 1	FFPE material 5083888030_B.AVG_Signal	FFPE Gastric Adenocarcinoma	4	16.3	1
GSM644837 1	FFPE material 5083888030_A.AVG_Signal	FFPE Gastric Adenocarcinoma	2	61.9	0
GSM644836 1	FFPE material 5083888029_H.AVG_Signal	FFPE Gastric Adenocarcinoma	2	11.9	1
GSM644835 1	FFPE material 5083888029_F.AVG_Signal	FFPE Gastric Adenocarcinoma	3B	59.5	1
GSM644834 1	FFPE material 5083888029_D.AVG_Signal	FFPE Gastric Adenocarcinoma	4	14.3	1
GSM644833 1	FFPE material 5083888029_C.AVG_Signal	FFPE Gastric Adenocarcinoma	4	98.5	0
GSM644832 1	FFPE material 5083888029_B.AVG_Signal	FFPE Gastric Adenocarcinoma	2	94.2	0
GSM644831 1	FFPE material 5083888029_A.AVG_Signal	FFPE Gastric Adenocarcinoma	3A	104	0
GSM644830 1	FFPE material 5083888023_H.AVG_Signal	FFPE Gastric Adenocarcinoma	3A	16.2	1
GSM644829 1	FFPE material 5083888023_G.AVG_Signal	FFPE Gastric Adenocarcinoma	2	78.6	0
GSM644828 1	FFPE material 5083888023_E.AVG_Signal	FFPE Gastric Adenocarcinoma	4	17.5	1
GSM644827 1	FFPE material 5083888023_D.AVG_Signal	FFPE Gastric Adenocarcinoma	2	90.8	1
GSM644826 1	FFPE material 5083888023_C.AVG_Signal	FFPE Gastric Adenocarcinoma	3A	52	0
GSM644825 1	FFPE material 5083888023_B.AVG_Signal	FFPE Gastric Adenocarcinoma	3A	102.5	0
GSM644824 1	FFPE material 5083888023_A.AVG_Signal	FFPE Gastric Adenocarcinoma	4	25	1
GSM644823 1	FFPE material 5083888012_H.AVG_Signal	FFPE Gastric Adenocarcinoma	3A	6.1	1
GSM644822 1	FFPE material 5083888012_G.AVG_Signal	FFPE Gastric Adenocarcinoma	1B	13.1	1
GSM644821 1	FFPE material 5083888012_E.AVG_Signal	FFPE Gastric Adenocarcinoma	1B	74.8	0
GSM644820 1	FFPE material 5083888012_D.AVG_Signal	FFPE Gastric Adenocarcinoma	1B	124.9	0
GSM644819 1	FFPE material 5083888012_C.AVG_Signal	FFPE Gastric Adenocarcinoma	2	9.8	1
GSM644818 1	FFPE material 5083888011_H.AVG_Signal	FFPE Gastric Adenocarcinoma	4	127.3	0
GSM644817 1	FFPE material 5083888011_G.AVG_Signal	FFPE Gastric Adenocarcinoma	4	11.9	1
GSM644816 1	FFPE material 5083888011_F.AVG_Signal	FFPE Gastric Adenocarcinoma	1B	130.6	0
GSM644815 1	FFPE material 5083888011_E.AVG_Signal	FFPE Gastric Adenocarcinoma	3B	24.3	1
GSM644814 1	FFPE material 5083888011_C.AVG_Signal	FFPE Gastric Adenocarcinoma	3A	122	0
GSM644813 1	FFPE material 5083888001_G.AVG_Signal	FFPE Gastric Adenocarcinoma	4	19.8	1
GSM644812 1	FFPE material 5370941044_A.AVG_Signal	FFPE Gastric Adenocarcinoma	1B	36.7	0
GSM644811 1	FFPE material 5370941041_H.AVG_Signal	FFPE Gastric Adenocarcinoma	2	43.8	0
GSM644810 1	FFPE material 5370941041_G.AVG_Signal	FFPE Gastric Adenocarcinoma	2	12.6	0
GSM644809 1	FFPE material 5370941041_F.AVG_Signal	FFPE Gastric Adenocarcinoma	1B	51.5	0
GSM644808 1	FFPE material 5370941041_E.AVG_Signal	FFPE Gastric Adenocarcinoma	3A	49	0
GSM644807 1	FFPE material 5370941041_D.AVG_Signal	FFPE Gastric Adenocarcinoma	4	4.6	1
GSM644806 1	FFPE material 5370941041_C.AVG_Signal	FFPE Gastric Adenocarcinoma	2	14.9	1
GSM644805 1	FFPE material 5370941041_B.AVG_Signal	FFPE Gastric Adenocarcinoma	1B	29.2	0
GSM644804 1	FFPE material 5370941041_A.AVG_Signal	FFPE Gastric Adenocarcinoma	2	61.9	0
GSM644803 1	FFPE material 5370941030_G.AVG_Signal	FFPE Gastric Adenocarcinoma	1B	62	0
GSM644802 1	FFPE material 5370941030_F.AVG_Signal	FFPE Gastric Adenocarcinoma	2	1.9	1
GSM644801 1	FFPE material 5370941030_E.AVG_Signal	FFPE Gastric Adenocarcinoma	3A	6.4	1
GSM644800 1	FFPE material 5370941030_D.AVG_Signal	FFPE Gastric Adenocarcinoma	3A	59.2	0
GSM644799 1	FFPE material 5370941030_C.AVG_Signal	FFPE Gastric Adenocarcinoma	4	66.4	0
GSM644798 1	FFPE material 5370941030_B.AVG_Signal	FFPE Gastric Adenocarcinoma	3B	8.1	1
GSM644797 1	FFPE material 5370941030_A.AVG_Signal	FFPE Gastric Adenocarcinoma	1B	62.8	0
GSM644796 1	FFPE material 5370941029_G.AVG_Signal	FFPE Gastric Adenocarcinoma	2	72.5	0
GSM644795 1	FFPE material 5370941029_F.AVG_Signal	FFPE Gastric Adenocarcinoma	2	9.4	1
GSM644794 1	FFPE material 5370941029_D.AVG_Signal	FFPE Gastric Adenocarcinoma	1B	73.5	0
GSM644793 1	FFPE material 5370941029_C.AVG_Signal	FFPE Gastric Adenocarcinoma	2	14.2	1
GSM644792 1	FFPE material 5370941029_A.AVG_Signal	FFPE Gastric Adenocarcinoma	1B	68.4	0
GSM644791 1	FFPE material 5370941017_H.AVG_Signal	FFPE Gastric Adenocarcinoma	4	80	0
GSM644790 1	FFPE material 5370941017_G.AVG_Signal	FFPE Gastric Adenocarcinoma	3A	80	0
GSM644789 1	FFPE material 5370941017_F.AVG_Signal	FFPE Gastric Adenocarcinoma	2	20.3	1
GSM644788 1	FFPE material 5370941017_E.AVG_Signal	FFPE Gastric Adenocarcinoma	1B	72.7	0
GSM644787 1	FFPE material 5370941017_D.AVG_Signal	FFPE Gastric Adenocarcinoma	3A	36.7	0
GSM644786 1	FFPE material 5370941017_C.AVG_Signal	FFPE Gastric Adenocarcinoma	2	73.5	1
GSM644785 1	FFPE material 5370941017_B.AVG_Signal	FFPE Gastric Adenocarcinoma	2	84.2	0
GSM644784 1	FFPE material 5370941017_A.AVG_Signal	FFPE Gastric Adenocarcinoma	3A	52.8	1
GSM644783 1	FFPE material 5370941016_H.AVG_Signal	FFPE Gastric Adenocarcinoma	4	13.7	0
GSM644782 1	FFPE material 5370941016_G.AVG_Signal	FFPE Gastric Adenocarcinoma	2	18.4	1
GSM644781 1	FFPE material 5370941016_F.AVG_Signal	FFPE Gastric Adenocarcinoma	2	66.9	0
GSM644780 1	FFPE material 5370941016_E.AVG_Signal	FFPE Gastric Adenocarcinoma	2	88.3	0
GSM644779 1	FFPE material 5370941016_D.AVG_Signal	FFPE Gastric Adenocarcinoma	3A	75.2	0
GSM644778 1	FFPE material 5370941016_A.AVG_Signal	FFPE Gastric Adenocarcinoma	2	87.3	0
GSM644777 1	FFPE material 5368120054_G.AVG_Signal	FFPE Gastric Adenocarcinoma	4	26	1
GSM644776 1	FFPE material 5368120054_F.AVG_Signal	FFPE Gastric Adenocarcinoma	4	30.3	1
GSM644775 1	FFPE material 5368120054_E.AVG_Signal	FFPE Gastric Adenocarcinoma	2	59.9	0
GSM644774 1	FFPE material 5368120054_C.AVG_Signal	FFPE Gastric Adenocarcinoma	4	69.2	0
GSM644773 1	FFPE material 5368120054_A.AVG_Signal	FFPE Gastric Adenocarcinoma	1B	96.9	0
GSM644772 1	FFPE material 5368120053_H.AVG_Signal	FFPE Gastric Adenocarcinoma	3B	78.2	1
GSM644771 1	FFPE material 5368120053_G.AVG_Signal	FFPE Gastric Adenocarcinoma	3A	98.5	0
GSM644770 1	FFPE material 5368120053_F.AVG_Signal	FFPE Gastric Adenocarcinoma	3A	21.3	1
GSM644769 1	FFPE material 5368120053_E.AVG_Signal	FFPE Gastric Adenocarcinoma	2	57.6	0
GSM644768 1	FFPE material 5368120053_D.AVG_Signal	FFPE Gastric Adenocarcinoma	2	23.3	1
GSM644767 1	FFPE material 5368120053_C.AVG_Signal	FFPE Gastric Adenocarcinoma	3B	101.8	0
GSM644766 1	FFPE material 5368120053_B.AVG_Signal	FFPE Gastric Adenocarcinoma	2	46.4	0
GSM644765 1	FFPE material 5368120053_A.AVG_Signal	FFPE Gastric Adenocarcinoma	2	62.5	0
GSM644764 1	FFPE material 5368120052_H.AVG_Signal	FFPE Gastric Adenocarcinoma	3A	20.3	1
GSM644763 1	FFPE material 5368120052_G.AVG_Signal	FFPE Gastric Adenocarcinoma	4	113	0
GSM644762 1	FFPE material 5368120052_F.AVG_Signal	FFPE Gastric Adenocarcinoma	2	112.6	0
GSM644761 1	FFPE material 5368120052_D.AVG_Signal	FFPE Gastric Adenocarcinoma	2	80.5	0
GSM644760 1	FFPE material 5368120052_A.AVG_Signal	FFPE Gastric Adenocarcinoma	2	111.5	0
GSM644759 1	FFPE material 5368120041_H.AVG_Signal	FFPE Gastric Adenocarcinoma	3A	14.8	0
GSM644758 1	FFPE material 5368120041_G.AVG_Signal	FFPE Gastric Adenocarcinoma	1B	122.2	0
GSM644757 1	FFPE material 5368120041_D.AVG_Signal	FFPE Gastric Adenocarcinoma	4	74.6	1
GSM644756 1	FFPE material 5368120041_C.AVG_Signal	FFPE Gastric Adenocarcinoma	3B	74.4	0
GSM644755 1	FFPE material 5368120041_B.AVG_Signal	FFPE Gastric Adenocarcinoma	2	26	0
GSM644754 1	FFPE material 5368120041_A.AVG_Signal	FFPE Gastric Adenocarcinoma	2	15.6	1
GSM644753 1	FFPE material 5368120040_H.AVG_Signal	FFPE Gastric Adenocarcinoma	3B	29.4	1
GSM644752 1	FFPE material 5368120040_G.AVG_Signal	FFPE Gastric Adenocarcinoma	2	16.5	1
GSM644751 1	FFPE material 5368120040_F.AVG_Signal	FFPE Gastric Adenocarcinoma	2	117.1	0
GSM644750 1	FFPE material 5368120040_E.AVG_Signal	FFPE Gastric Adenocarcinoma	3A	36.8	1
GSM644749 1	FFPE material 5368120040_C.AVG_Signal	FFPE Gastric Adenocarcinoma	2	145.8	0
GSM644748 1	FFPE material 5368120040_B.AVG_Signal	FFPE Gastric Adenocarcinoma	2	46.2	1
GSM644747 1	FFPE material 5368120040_A.AVG_Signal	FFPE Gastric Adenocarcinoma	3A	25	1
GSM644746 1	FFPE material 5368120033_H.AVG_Signal	FFPE Gastric Adenocarcinoma	3A	9.6	1
GSM644745 1	FFPE material 5368120033_G.AVG_Signal	FFPE Gastric Adenocarcinoma	2	31.9	0
GSM644744 1	FFPE material 5368120033_F.AVG_Signal	FFPE Gastric Adenocarcinoma	3A	51.5	1
GSM644743 1	FFPE material 5368120033_E.AVG_Signal	FFPE Gastric Adenocarcinoma	1B	56.7	0
GSM644742 1	FFPE material 5368120033_D.AVG_Signal	FFPE Gastric Adenocarcinoma	4	31.1	1
GSM644741 1	FFPE material 5368120033_B.AVG_Signal	FFPE Gastric Adenocarcinoma	3B	3.8	1
GSM644740 1	FFPE material 5368120033_A.AVG_Signal	FFPE Gastric Adenocarcinoma	3A	8.3	1
GSM644739 1	FFPE material 5370941040_H.AVG_Signal	FFPE Gastric Adenocarcinoma	3A	115.1	0
GSM644738 1	FFPE material 5370941040_G.AVG_Signal	FFPE Gastric Adenocarcinoma	2	123.6	0
GSM644737 1	FFPE material 5370941040_F.AVG_Signal	FFPE Gastric Adenocarcinoma	3A	41.4	0
GSM644736 1	FFPE material 5370941040_E.AVG_Signal	FFPE Gastric Adenocarcinoma	4	106.6	0
GSM644735 1	FFPE material 5370941040_D.AVG_Signal	FFPE Gastric Adenocarcinoma	3A	90.1	0
GSM644734 1	FFPE material 5370941040_C.AVG_Signal	FFPE Gastric Adenocarcinoma	4	5	1
GSM644733 1	FFPE material 5370941040_B.AVG_Signal	FFPE Gastric Adenocarcinoma	2	45.5	0
GSM644732 1	FFPE material 5370941040_A.AVG_Signal	FFPE Gastric Adenocarcinoma	3A	49.3	0
GSM644731 1	FFPE material 5370941024_H.AVG_Signal	FFPE Gastric Adenocarcinoma	2	53.8	0
GSM644730 1	FFPE material 5370941024_G.AVG_Signal	FFPE Gastric Adenocarcinoma	1B	12.7	1
GSM644729 1	FFPE material 5370941024_F.AVG_Signal	FFPE Gastric Adenocarcinoma	2	58.6	0
GSM644728 1	FFPE material 5370941024_E.AVG_Signal	FFPE Gastric Adenocarcinoma	2	61.1	0
GSM644727 1	FFPE material 5370941024_D.AVG_Signal	FFPE Gastric Adenocarcinoma	2	12.4	1
GSM644726 1	FFPE material 5370941024_C.AVG_Signal	FFPE Gastric Adenocarcinoma	3A	5.7	1
GSM644725 1	FFPE material 5370941024_B.AVG_Signal	FFPE Gastric Adenocarcinoma	4	11	1
GSM644724 1	FFPE material 5370941024_A.AVG_Signal	FFPE Gastric Adenocarcinoma	1B	65.1	0
GSM644723 1	FFPE material 5370941022_F.AVG_Signal	FFPE Gastric Adenocarcinoma	1B	68.4	0
GSM644722 1	FFPE material 5370941022_E.AVG_Signal	FFPE Gastric Adenocarcinoma	2	44	0
GSM644721 1	FFPE material 5370941022_C.AVG_Signal	FFPE Gastric Adenocarcinoma	2	62	0
GSM644720 1	FFPE material 5370941022_B.AVG_Signal	FFPE Gastric Adenocarcinoma	3A	60.9	0
GSM644719 1	FFPE material 5370941022_A.AVG_Signal	FFPE Gastric Adenocarcinoma	3A	70.1	0
GSM644718 1	FFPE material 5370941004_G.AVG_Signal	FFPE Gastric Adenocarcinoma	2	70.8	0
GSM644717 1	FFPE material 5370941004_F.AVG_Signal	FFPE Gastric Adenocarcinoma	2	25.5	1
GSM644716 1	FFPE material 5370941004_E.AVG_Signal	FFPE Gastric Adenocarcinoma	3A	62.2	1
GSM644715 1	FFPE material 5370941004_D.AVG_Signal	FFPE Gastric Adenocarcinoma	2	75	0
GSM644714 1	FFPE material 5370941004_C.AVG_Signal	FFPE Gastric Adenocarcinoma	2	15.8	0
GSM644713 1	FFPE material 5370941004_B.AVG_Signal	FFPE Gastric Adenocarcinoma	3A	19.4	0
GSM644712 1	FFPE material 5370941004_A.AVG_Signal	FFPE Gastric Adenocarcinoma	2	15.9	1
GSM644711 1	FFPE material 5370941002_H.AVG_Signal	FFPE Gastric Adenocarcinoma	4	25.7	1
GSM644710 1	FFPE material 5370941002_G.AVG_Signal	FFPE Gastric Adenocarcinoma	2	71.3	0
GSM644709 1	FFPE material 5370941002_F.AVG_Signal	FFPE Gastric Adenocarcinoma	2	74.9	0
GSM644708 1	FFPE material 5370941002_E.AVG_Signal	FFPE Gastric Adenocarcinoma	1B	66.9	0
GSM644707 1	FFPE material 5370941002_C.AVG_Signal	FFPE Gastric Adenocarcinoma	3A	12.3	1
GSM644706 1	FFPE material 5370941002_A.AVG_Signal	FFPE Gastric Adenocarcinoma	3A	84.5	0
GSM644705 1	FFPE material 5370941001_B.AVG_Signal	FFPE Gastric Adenocarcinoma	3A	6.2	1
GSM644704 1	FFPE material 5368120012_H.AVG_Signal	FFPE Gastric Adenocarcinoma	2	114.9	0
GSM644703 1	FFPE material 5368120012_G.AVG_Signal	FFPE Gastric Adenocarcinoma	3A	49.6	1
GSM644702 1	FFPE material 5368120011_A.AVG_Signal	FFPE Gastric Adenocarcinoma	3A	21.9	1
GSM644701 1	FFPE material 5368120006_F.AVG_Signal	FFPE Gastric Adenocarcinoma	2	97.5	0
GSM644700 1	FFPE material 5368120006_E.AVG_Signal	FFPE Gastric Adenocarcinoma	4	65.8	0
GSM644699 1	FFPE material 5368120006_D.AVG_Signal	FFPE Gastric Adenocarcinoma	3A	16.1	1
GSM644698 1	FFPE material 5368120006_C.AVG_Signal	FFPE Gastric Adenocarcinoma	3A	109.7	0
GSM644697 1	FFPE material 5368120006_B.AVG_Signal	FFPE Gastric Adenocarcinoma	3A	116.6	0
GSM644696 1	FFPE material 5368120006_A.AVG_Signal	FFPE Gastric Adenocarcinoma	3A	114.2	0
GSM644695 1	FFPE material 5368120005_H.AVG_Signal	FFPE Gastric Adenocarcinoma	3A	77.9	0
GSM644694 1	FFPE material 5368120005_F.AVG_Signal	FFPE Gastric Adenocarcinoma	3A	125.7	0
GSM644693 1	FFPE material 5368120005_E.AVG_Signal	FFPE Gastric Adenocarcinoma	2	116.6	0
GSM644692 1	FFPE material 5368120005_D.AVG_Signal	FFPE Gastric Adenocarcinoma	3A	88	0
GSM644691 1	FFPE material 5368120005_C.AVG_Signal	FFPE Gastric Adenocarcinoma	1B	111.7	0
GSM644690 1	FFPE material 5368120005_B.AVG_Signal	FFPE Gastric Adenocarcinoma	2	130.7	0
GSM644689 1	FFPE material 5368120005_A.AVG_Signal	FFPE Gastric Adenocarcinoma	1B	116.2	0
GSM644688 1	FFPE material 5368120004_H.AVG_Signal	FFPE Gastric Adenocarcinoma	2	127.8	0
GSM644687 1	FFPE material 5368120004_G.AVG_Signal	FFPE Gastric Adenocarcinoma	4	27.3	1
GSM644686 1	FFPE material 5368120004_F.AVG_Signal	FFPE Gastric Adenocarcinoma	3B	39.7	1
GSM644685 1	FFPE material 5368120004_E.AVG_Signal	FFPE Gastric Adenocarcinoma	2	130	0
GSM644684 1	FFPE material 5368120004_D.AVG_Signal	FFPE Gastric Adenocarcinoma	1B	99.2	0
GSM644683 1	FFPE material 5368120004_C.AVG_Signal	FFPE Gastric Adenocarcinoma	3A	7.8	1
GSM644682 1	FFPE material 5368120004_B.AVG_Signal	FFPE Gastric Adenocarcinoma	3A	143.2	0
GSM644681 1	FFPE material 5368120004_A.AVG_Signal	FFPE Gastric Adenocarcinoma	2	147.1	0
GSM644680 1	FFPE material 5368120003_H.AVG_Signal	FFPE Gastric Adenocarcinoma	3A	21.6	1
GSM644679 1	FFPE material 5368120003_G.AVG_Signal	FFPE Gastric Adenocarcinoma	2	118.7	0
GSM644678 1	FFPE material 5368120003_F.AVG_Signal	FFPE Gastric Adenocarcinoma	1B	92.4	0
GSM644677 1	FFPE material 5368120003_E.AVG_Signal	FFPE Gastric Adenocarcinoma	2	36.8	0
GSM644676 1	FFPE material 5368120003_D.AVG_Signal	FFPE Gastric Adenocarcinoma	3A	112.2	0
GSM644675 1	FFPE material 5368120003_C.AVG_Signal	FFPE Gastric Adenocarcinoma	1B	57.3	0
GSM644674 1	FFPE material 5368120003_B.AVG_Signal	FFPE Gastric Adenocarcinoma	4	38.1	1
GSM644673 1	FFPE material 5038711087_H.AVG_Signal	FFPE Gastric Adenocarcinoma	4	16.1	1
GSM644672 1	FFPE material 5038711087_C.AVG_Signal	FFPE Gastric Adenocarcinoma	3A	48.4	0
GSM644671 1	FFPE material 5038711087_B.AVG_Signal	FFPE Gastric Adenocarcinoma	4	7.3	1
GSM644670 1	FFPE material 5038711087_A.AVG_Signal	FFPE Gastric Adenocarcinoma	3A	6.6	1
GSM644669 1	FFPE material 5038711086_H.AVG_Signal	FFPE Gastric Adenocarcinoma	3A	48.6	0
GSM644668 1	FFPE material 5038711086_F.AVG_Signal	FFPE Gastric Adenocarcinoma	2	59.3	0
GSM644667 1	FFPE material 5038711086_E.AVG_Signal	FFPE Gastric Adenocarcinoma	2	18.8	1
GSM644666 1	FFPE material 5038711086_D.AVG_Signal	FFPE Gastric Adenocarcinoma	3A	12.9	1
GSM644665 1	FFPE material 5038711086_B.AVG_Signal	FFPE Gastric Adenocarcinoma	3A	28.8	1
GSM644664 1	FFPE material 5038711086_A.AVG_Signal	FFPE Gastric Adenocarcinoma	1B	57.4	0
GSM644663 1	FFPE material 5038711077_G.AVG_Signal	FFPE Gastric Adenocarcinoma	1B	61.3	0
GSM644662 1	FFPE material 5038711077_F.AVG_Signal	FFPE Gastric Adenocarcinoma	1B	60.4	0
GSM644661 1	FFPE material 5038711077_D.AVG_Signal	FFPE Gastric Adenocarcinoma	2	67.2	0
GSM644660 1	FFPE material 5038711077_C.AVG_Signal	FFPE Gastric Adenocarcinoma	4	11.6	1
GSM644659 1	FFPE material 5038711077_A.AVG_Signal	FFPE Gastric Adenocarcinoma	2	61.1	0
GSM644658 1	FFPE material 5038711076_H.AVG_Signal	FFPE Gastric Adenocarcinoma	2	20.2	1
GSM644657 1	FFPE material 5038711076_G.AVG_Signal	FFPE Gastric Adenocarcinoma	3A	22.2	1
GSM644656 1	FFPE material 5038711076_F.AVG_Signal	FFPE Gastric Adenocarcinoma	2	21	1
GSM644655 1	FFPE material 5038711076_D.AVG_Signal	FFPE Gastric Adenocarcinoma	4	9.6	1
GSM644654 1	FFPE material 5038711076_C.AVG_Signal	FFPE Gastric Adenocarcinoma	3A	77.8	0
GSM644653 1	FFPE material 5038711076_B.AVG_Signal	FFPE Gastric Adenocarcinoma	2	78.9	0
GSM644652 1	FFPE material 5038711060_H.AVG_Signal	FFPE Gastric Adenocarcinoma	4	60.2	0
GSM644651 1	FFPE material 5038711060_G.AVG_Signal	FFPE Gastric Adenocarcinoma	2	60.4	0
GSM644650 1	FFPE material 5038711060_F.AVG_Signal	FFPE Gastric Adenocarcinoma	3A	74.3	0
GSM644649 1	FFPE material 5038711060_D.AVG_Signal	FFPE Gastric Adenocarcinoma	4	16.7	1
GSM644648 1	FFPE material 5038711060_B.AVG_Signal	FFPE Gastric Adenocarcinoma	2	10	1
GSM644647 1	FFPE material 5038711060_A.AVG_Signal	FFPE Gastric Adenocarcinoma	1B	78.2	0
GSM644646 1	FFPE material 5038711058_H.AVG_Signal	FFPE Gastric Adenocarcinoma	2	20.5	1
GSM644645 1	FFPE material 5038711058_E.AVG_Signal	FFPE Gastric Adenocarcinoma	4	6.9	1
GSM644644 1	FFPE material 5038711058_D.AVG_Signal	FFPE Gastric Adenocarcinoma	1B	84.1	0
GSM644643 1	FFPE material 5038711058_C.AVG_Signal	FFPE Gastric Adenocarcinoma	3A	20.5	1
GSM644642 1	FFPE material 5038711058_B.AVG_Signal	FFPE Gastric Adenocarcinoma	3A	27.9	1
GSM644641 1	FFPE material 5038711058_A.AVG_Signal	FFPE Gastric Adenocarcinoma	2	51.5	0
GSM644640 1	FFPE material 5038711047_H.AVG_Signal	FFPE Gastric Adenocarcinoma	2	92	0
GSM644639 1	FFPE material 5038711047_G.AVG_Signal	FFPE Gastric Adenocarcinoma	2	61.7	0
GSM644638 1	FFPE material 5038711047_F.AVG_Signal	FFPE Gastric Adenocarcinoma	4	48.6	1
GSM644637 1	FFPE material 5038711047_E.AVG_Signal	FFPE Gastric Adenocarcinoma	3A	85.1	0
GSM644636 1	FFPE material 5038711047_D.AVG_Signal	FFPE Gastric Adenocarcinoma	3A	12.5	1
GSM644635 1	FFPE material 5038711047_C.AVG_Signal	FFPE Gastric Adenocarcinoma	3A	97.5	0
GSM644634 1	FFPE material 5038711047_B.AVG_Signal	FFPE Gastric Adenocarcinoma	4	101	0
GSM644633 1	FFPE material 5038711047_A.AVG_Signal	FFPE Gastric Adenocarcinoma	2	49.4	1
GSM644632 1	FFPE material 5038711046_H.AVG_Signal	FFPE Gastric Adenocarcinoma	3B	6	1
GSM644631 1	FFPE material 5038711046_G.AVG_Signal	FFPE Gastric Adenocarcinoma	3A	13.6	1
GSM644630 1	FFPE material 5038711046_F.AVG_Signal	FFPE Gastric Adenocarcinoma	1B	13.9	1
GSM644629 1	FFPE material 5038711046_E.AVG_Signal	FFPE Gastric Adenocarcinoma	2	23.7	1
GSM644628 1	FFPE material 5038711046_D.AVG_Signal	FFPE Gastric Adenocarcinoma	2	102.7	0
GSM644627 1	FFPE material 5038711046_C.AVG_Signal	FFPE Gastric Adenocarcinoma	1B	7.5	0
GSM644626 1	FFPE material 5038711046_B.AVG_Signal	FFPE Gastric Adenocarcinoma	2	110.3	0
GSM644625 1	FFPE material 5038711026_H.AVG_Signal	FFPE Gastric Adenocarcinoma	4	60.3	0
GSM644624 1	FFPE material 5038711026_G.AVG_Signal	FFPE Gastric Adenocarcinoma	1B	61.9	0
GSM644623 1	FFPE material 5038711026_F.AVG_Signal	FFPE Gastric Adenocarcinoma	3A	19.8	1
GSM644622 1	FFPE material 5038711026_D.AVG_Signal	FFPE Gastric Adenocarcinoma	3B	93.9	0
GSM644621 1	FFPE material 5038711026_C.AVG_Signal	FFPE Gastric Adenocarcinoma	2	65.3	0
GSM644620 1	FFPE material 5038711026_B.AVG_Signal	FFPE Gastric Adenocarcinoma	3A	116	0
GSM644619 1	FFPE material 5038711025_H.AVG_Signal	FFPE Gastric Adenocarcinoma	2	73.2	0
GSM644618 1	FFPE material 5038711025_G.AVG_Signal	FFPE Gastric Adenocarcinoma	2	121.8	0
GSM644617 1	FFPE material 5038711025_F.AVG_Signal	FFPE Gastric Adenocarcinoma	3A	6.6	1
GSM644616 1	FFPE material 5038711025_E.AVG_Signal	FFPE Gastric Adenocarcinoma	3A	7.1	1
GSM644615 1	FFPE material 5038711025_C.AVG_Signal	FFPE Gastric Adenocarcinoma	3A	19.8	0
GSM644614 1	FFPE material 5038711025_B.AVG_Signal	FFPE Gastric Adenocarcinoma	2	121	0
GSM644613 1	FFPE material 5038711025_A.AVG_Signal	FFPE Gastric Adenocarcinoma	2	106.2	0
GSM644612 1	FFPE material 5038711006_H.AVG_Signal	FFPE Gastric Adenocarcinoma	3A	121.5	0
GSM644611 1	FFPE material 5038711006_G.AVG_Signal	FFPE Gastric Adenocarcinoma	2	120.3	0
GSM644610 1	FFPE material 5038711006_F.AVG_Signal	FFPE Gastric Adenocarcinoma	3A	6.2	1
GSM644609 1	FFPE material 5038711006_D.AVG_Signal	FFPE Gastric Adenocarcinoma	2	117.2	0
GSM644608 1	FFPE material 5038711006_B.AVG_Signal	FFPE Gastric Adenocarcinoma	3A	26.6	1
GSM644607 1	FFPE material 5038711005_H.AVG_Signal	FFPE Gastric Adenocarcinoma	2	149.3	0
GSM644606 1	FFPE material 5038711005_G.AVG_Signal	FFPE Gastric Adenocarcinoma	1B	41.9	0
GSM644605 1	FFPE material 5038711005_F.AVG_Signal	FFPE Gastric Adenocarcinoma	1B	86.3	0
GSM644604 1	FFPE material 5038711005_D.AVG_Signal	FFPE Gastric Adenocarcinoma	4	11.3	1
GSM644603 1	FFPE material 5038711005_B.AVG_Signal	FFPE Gastric Adenocarcinoma	2	76.1	0
GSM644602 1	FFPE material 5038711005_A.AVG_Signal	FFPE Gastric Adenocarcinoma	4	7.9	1
GSM644601 1	FFPE material 5038711084_G.AVG_Signal	FFPE Gastric Adenocarcinoma	3A	11.8	1
GSM644600 1	FFPE material 5038711084_F.AVG_Signal	FFPE Gastric Adenocarcinoma	1B	151.8	0
GSM644599 1	FFPE material 5038711084_E.AVG_Signal	FFPE Gastric Adenocarcinoma	4	14.8	1
GSM644598 1	FFPE material 5038711084_D.AVG_Signal	FFPE Gastric Adenocarcinoma	2	96.2	0
GSM644597 1	FFPE material 5038711084_C.AVG_Signal	FFPE Gastric Adenocarcinoma	3A	158.6	0
GSM644596 1	FFPE material 5038711084_A.AVG_Signal	FFPE Gastric Adenocarcinoma	2	57.4	0
GSM644595 1	FFPE material 5038711075_H.AVG_Signal	FFPE Gastric Adenocarcinoma	2	7.6	1
GSM644594 1	FFPE material 5038711075_G.AVG_Signal	FFPE Gastric Adenocarcinoma	3A	167.6	0
GSM644593 1	FFPE material 5038711075_F.AVG_Signal	FFPE Gastric Adenocarcinoma	3B	11.7	0
GSM644592 1	FFPE material 5038711075_E.AVG_Signal	FFPE Gastric Adenocarcinoma	2	26.1	1
GSM644591 1	FFPE material 5038711075_D.AVG_Signal	FFPE Gastric Adenocarcinoma	2	58.1	0
GSM644590 1	FFPE material 5038711075_C.AVG_Signal	FFPE Gastric Adenocarcinoma	1B	37.6	1
GSM644589 1	FFPE material 5038711075_B.AVG_Signal	FFPE Gastric Adenocarcinoma	3A	58.1	0
GSM644588 1	FFPE material 5038711075_A.AVG_Signal	FFPE Gastric Adenocarcinoma	2	32.8	1
GSM644587 1	FFPE material 5038711074_H.AVG_Signal	FFPE Gastric Adenocarcinoma	1B	58.5	0
GSM644586 1	FFPE material 5038711074_F.AVG_Signal	FFPE Gastric Adenocarcinoma	2	52.4	0
GSM644585 1	FFPE material 5038711074_E.AVG_Signal	FFPE Gastric Adenocarcinoma	1B	64.6	0
GSM644584 1	FFPE material 5038711074_D.AVG_Signal	FFPE Gastric Adenocarcinoma	2	60.5	0
GSM644583 1	FFPE material 5038711074_C.AVG_Signal	FFPE Gastric Adenocarcinoma	2	12.4	1
GSM644582 1	FFPE material 5038711074_B.AVG_Signal	FFPE Gastric Adenocarcinoma	4	6.8	1
GSM644581 1	FFPE material 5038711074_A.AVG_Signal	FFPE Gastric Adenocarcinoma	2	65.9	0
GSM644580 1	FFPE material 5038711068_H.AVG_Signal	FFPE Gastric Adenocarcinoma	1B	64	0
GSM644579 1	FFPE material 5038711068_G.AVG_Signal	FFPE Gastric Adenocarcinoma	2	11.8	1
GSM644578 1	FFPE material 5038711068_F.AVG_Signal	FFPE Gastric Adenocarcinoma	1B	71.2	0
GSM644577 1	FFPE material 5038711068_E.AVG_Signal	FFPE Gastric Adenocarcinoma	3A	24	1
GSM644576 1	FFPE material 5038711068_C.AVG_Signal	FFPE Gastric Adenocarcinoma	2	63.8	0
GSM644575 1	FFPE material 5038711068_B.AVG_Signal	FFPE Gastric Adenocarcinoma	2	73.6	0
GSM644574 1	FFPE material 5038711068_A.AVG_Signal	FFPE Gastric Adenocarcinoma	3A	40.7	1
GSM644573 1	FFPE material 5038711064_G.AVG_Signal	FFPE Gastric Adenocarcinoma	4	36.6	1
GSM644572 1	FFPE material 5038711064_F.AVG_Signal	FFPE Gastric Adenocarcinoma	2	79.6	0
GSM644571 1	FFPE material 5038711064_E.AVG_Signal	FFPE Gastric Adenocarcinoma	2	45.3	1
GSM644570 1	FFPE material 5038711064_C.AVG_Signal	FFPE Gastric Adenocarcinoma	2	61.1	0
GSM644569 1	FFPE material 5038711064_B.AVG_Signal	FFPE Gastric Adenocarcinoma	1B	40.1	1
GSM644568 1	FFPE material 5038711064_A.AVG_Signal	FFPE Gastric Adenocarcinoma	2	85.1	0
GSM644567 1	FFPE material 5038711059_H.AVG_Signal	FFPE Gastric Adenocarcinoma	1B	82.4	0
GSM644566 1	FFPE material 5038711059_G.AVG_Signal	FFPE Gastric Adenocarcinoma	1B	47	1
GSM644565 1	FFPE material 5038711059_F.AVG_Signal	FFPE Gastric Adenocarcinoma	3A	28.2	1
GSM644564 1	FFPE material 5038711059_C.AVG_Signal	FFPE Gastric Adenocarcinoma	2	73	1
GSM644563 1	FFPE material 5038711059_B.AVG_Signal	FFPE Gastric Adenocarcinoma	2	13.6	1
GSM644562 1	FFPE material 5038711059_A.AVG_Signal	FFPE Gastric Adenocarcinoma	4	13	1
GSM644561 1	FFPE material 5038711054_H.AVG_Signal	FFPE Gastric Adenocarcinoma	3A	89.6	0
GSM644560 1	FFPE material 5038711054_G.AVG_Signal	FFPE Gastric Adenocarcinoma	2	46.3	0
GSM644559 1	FFPE material 5038711054_F.AVG_Signal	FFPE Gastric Adenocarcinoma	2	92.9	0
GSM644558 1	FFPE material 5038711054_E.AVG_Signal	FFPE Gastric Adenocarcinoma	3A	7.1	1
GSM644557 1	FFPE material 5038711054_D.AVG_Signal	FFPE Gastric Adenocarcinoma	4	14.1	1
GSM644556 1	FFPE material 5038711054_C.AVG_Signal	FFPE Gastric Adenocarcinoma	4	12	1
GSM644555 1	FFPE material 5038711054_B.AVG_Signal	FFPE Gastric Adenocarcinoma	2	80.3	0
GSM644554 1	FFPE material 5038711054_A.AVG_Signal	FFPE Gastric Adenocarcinoma	2	92.9	0
GSM644553 1	FFPE material 5038711053_H.AVG_Signal	FFPE Gastric Adenocarcinoma	2	96.3	0
GSM644552 1	FFPE material 5038711053_G.AVG_Signal	FFPE Gastric Adenocarcinoma	3B	94.6	0
GSM644551 1	FFPE material 5038711053_F.AVG_Signal	FFPE Gastric Adenocarcinoma	4	98.8	0
GSM644550 1	FFPE material 5038711053_E.AVG_Signal	FFPE Gastric Adenocarcinoma	4	98.5	0
GSM644549 1	FFPE material 5038711053_D.AVG_Signal	FFPE Gastric Adenocarcinoma	2	104.8	0
GSM644548 1	FFPE material 5038711053_C.AVG_Signal	FFPE Gastric Adenocarcinoma	2	102.9	0
GSM644547 1	FFPE material 5038711053_B.AVG_Signal	FFPE Gastric Adenocarcinoma	3A	18.5	1
GSM644546 1	FFPE material 5038711053_A.AVG_Signal	FFPE Gastric Adenocarcinoma	1B	38	1
GSM644545 1	FFPE material 5038711048_H.AVG_Signal	FFPE Gastric Adenocarcinoma	2	48.8	1
GSM644544 1	FFPE material 5038711048_G.AVG_Signal	FFPE Gastric Adenocarcinoma	2	33.5	0
GSM644543 1	FFPE material 5038711048_F.AVG_Signal	FFPE Gastric Adenocarcinoma	4	15.8	1
GSM644542 1	FFPE material 5038711048_D.AVG_Signal	FFPE Gastric Adenocarcinoma	2	102.2	0
GSM644541 1	FFPE material 5038711048_C.AVG_Signal	FFPE Gastric Adenocarcinoma	2	108.3	0
GSM644540 1	FFPE material 5038711048_B.AVG_Signal	FFPE Gastric Adenocarcinoma	3A	9.2	1
GSM644539 1	FFPE material 5038711048_A.AVG_Signal	FFPE Gastric Adenocarcinoma	2	58	0
GSM644538 1	FFPE material 5038711024_H.AVG_Signal	FFPE Gastric Adenocarcinoma	3A	35.1	1
GSM644537 1	FFPE material 5038711024_G.AVG_Signal	FFPE Gastric Adenocarcinoma	3B	42.3	1
GSM644536 1	FFPE material 5038711024_F.AVG_Signal	FFPE Gastric Adenocarcinoma	3A	109.4	0
GSM644535 1	FFPE material 5038711024_E.AVG_Signal	FFPE Gastric Adenocarcinoma	2	80.9	0
GSM644534 1	FFPE material 5038711024_D.AVG_Signal	FFPE Gastric Adenocarcinoma	3A	38.2	0
GSM644533 1	FFPE material 5038711024_C.AVG_Signal	FFPE Gastric Adenocarcinoma	1B	131.8	0
GSM644532 1	FFPE material 5038711024_B.AVG_Signal	FFPE Gastric Adenocarcinoma	3A	15.3	1
GSM644531 1	FFPE material 5038711023_G.AVG_Signal	FFPE Gastric Adenocarcinoma	4	15.4	1
GSM644530 1	FFPE material 5038711023_F.AVG_Signal	FFPE Gastric Adenocarcinoma	4	41.4	1
GSM644529 1	FFPE material 5038711023_E.AVG_Signal	FFPE Gastric Adenocarcinoma	3B	3	1
GSM644528 1	FFPE material 5038711023_D.AVG_Signal	FFPE Gastric Adenocarcinoma	2	98.7	0
GSM644527 1	FFPE material 5038711023_B.AVG_Signal	FFPE Gastric Adenocarcinoma	3A	66.8	0
GSM644526 1	FFPE material 5038711023_A.AVG_Signal	FFPE Gastric Adenocarcinoma	3B	133.1	0
GSM644525 1	FFPE material 5038711022_G.AVG_Signal	FFPE Gastric Adenocarcinoma	1B	152.1	0
GSM644524 1	FFPE material 5038711022_F.AVG_Signal	FFPE Gastric Adenocarcinoma	4	9.1	1
GSM644523 1	FFPE material 5038711022_E.AVG_Signal	FFPE Gastric Adenocarcinoma	3A	155.3	0
GSM644522 1	FFPE material 5038711022_D.AVG_Signal	FFPE Gastric Adenocarcinoma	2	124.6	0
GSM644521 1	FFPE material 5038711022_C.AVG_Signal	FFPE Gastric Adenocarcinoma	3A	21.4	0
GSM644520 1	FFPE material 5038711022_B.AVG_Signal	FFPE Gastric Adenocarcinoma	3A	23.1	1
GSM644519 1	FFPE material 5038711022_A.AVG_Signal	FFPE Gastric Adenocarcinoma	2	163.1	0
